# Supplementary material for: Photon and Proton irradiation in Patient-derived, Three-Dimensional Soft Tissue Sarcoma Models
Source: Springer Nature journal article supplement (doi:10.1186/s12885-023-11013-y), 2023-06-22
Supplement: MOESM2 [file 25525662]

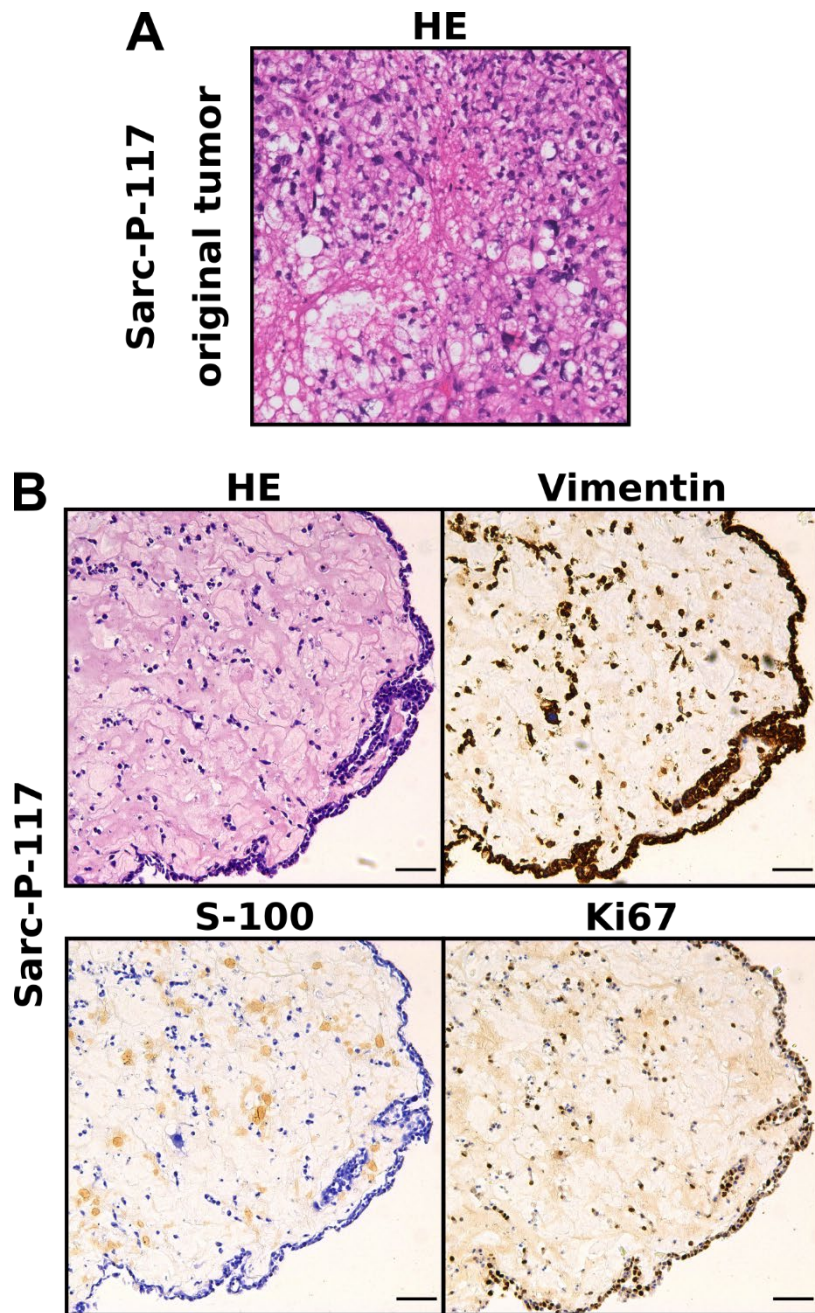

Supplementary figure 2 H&E and IHC staining from the original tumor and the PD3D model of PLS (Sarc-P-117)

(A) Representative H&E staining of the original tumor, 20 x magnification. (B) Representative H&E and IHC stainings of the PD3D model, scale bar – 100  $\mu$ m.
