# Supplementary material for: Photon and Proton irradiation in Patient-derived, Three-Dimensional Soft Tissue Sarcoma Models
Source: Springer Nature journal article supplement (doi:10.1186/s12885-023-11013-y), 2023-06-22
Supplement: MOESM3 [file 25525662]

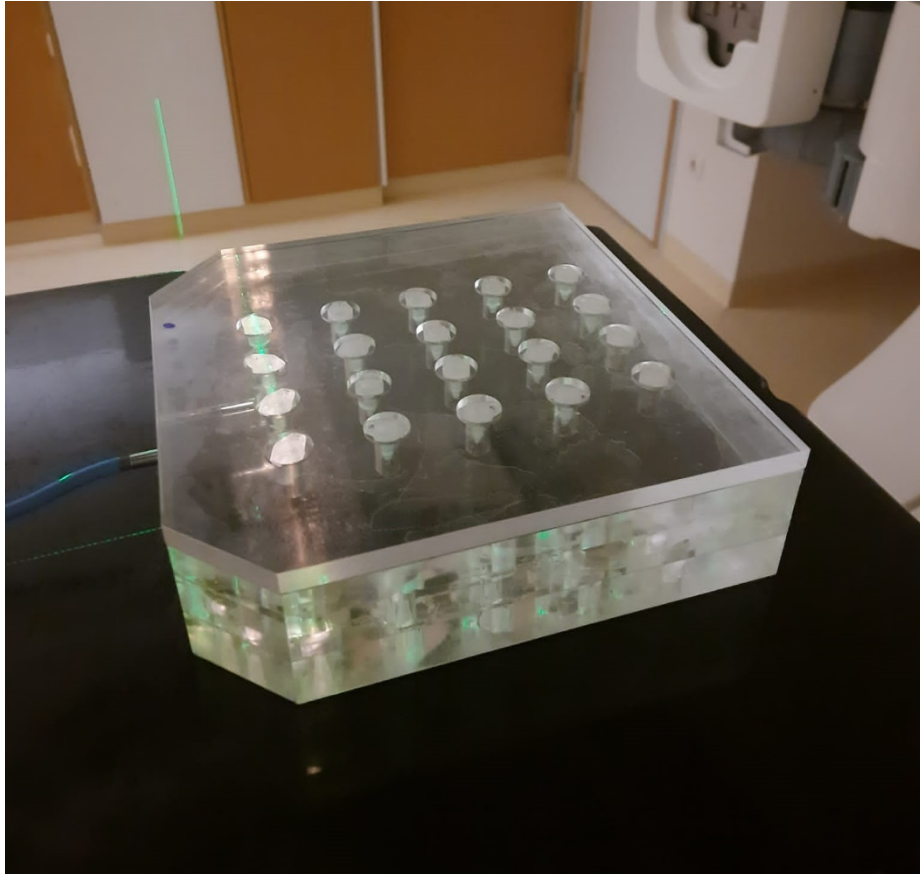

**Supplementary figure 3 Plexiglass sample holder used for photon irradiation**

The 1.5 ml Eppendorf tubes with samples were placed in drill holes in the plexiglass block and covered with a plexiglass top.
