# Supplementary material for: Photon and Proton irradiation in Patient-derived, Three-Dimensional Soft Tissue Sarcoma Models
Source: Springer Nature journal article supplement (doi:10.1186/s12885-023-11013-y), 2023-06-22
Supplement: MOESM4 [file 25525662]

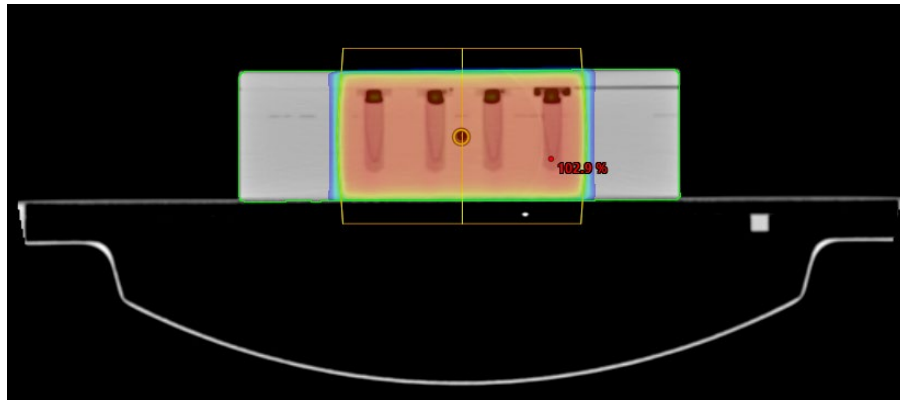

**Supplementary figure 4 Computed tomography of plexiglass holder for planning of the photon irradiation**

Computed tomography was used for planning of the photon irradiation of samples. The coloring indicates a homogeneous distribution of radiation in the samples.
