# Supplementary material for: Photon and Proton irradiation in Patient-derived, Three-Dimensional Soft Tissue Sarcoma Models
Source: Springer Nature journal article supplement (doi:10.1186/s12885-023-11013-y), 2023-06-22
Supplement: MOESM6 [file 25525662]

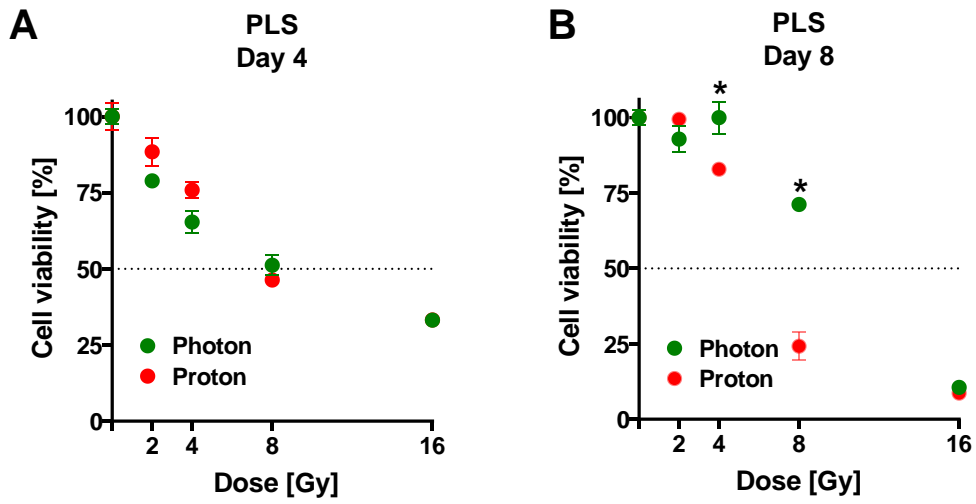

**Supplementary figure 6 Effects of photon vs. proton irradiation on PLS (Sarc-P-117)**

Viability of PLS cell culture after 4 (A) and 8 (B) days of incubation following increasing dosages of photon and proton irradiation. Mean  $\pm$  standard error of the mean; empty circles, cells overgrown; \*,  $p < 0.05$  comparison between the same dosages of photon vs. proton irradiation; at least one experiment with 4 technical replicates in each.
